# Supplementary material for: XCC2—a new coupled cluster model for the second-order polarization propagator
Source: Royal Society of Chemistry journal article supplement (doi:10.1039/c0cp00474j), 2010-01-01
Supplement: c0cp00474j.pdf [file c0cp00474j.pdf]

**XCC2 – a new coupled cluster model for second-order  
polarization propagator.  
Supporting Information**

Tatiana Korona\*

*Faculty of Chemistry, University of Warsaw,  
Pasteura 1, 02-093 Warsaw, Poland*

---

\*Electronic address: [tatiana.korona@chem.uw.edu.pl](mailto:tatiana.korona@chem.uw.edu.pl)

TABLE I: Components of dipole polarizabilities for 24 molecules used to generate the statistical data presented in the paper. All values in a.u. Missing polarizabilities correspond to unconverged first-order excitation operators

| method          | $\omega = 0.0$ |               |               | $\omega = 0.1$ |               |               | $\omega = 0.2$ |               |               |
|-----------------|----------------|---------------|---------------|----------------|---------------|---------------|----------------|---------------|---------------|
|                 | $\alpha_{xx}$  | $\alpha_{yy}$ | $\alpha_{zz}$ | $\alpha_{xx}$  | $\alpha_{yy}$ | $\alpha_{zz}$ | $\alpha_{xx}$  | $\alpha_{yy}$ | $\alpha_{zz}$ |
| 3-pentanone     |                |               |               |                |               |               |                |               |               |
| XCCSD           | 76.679         | 67.280        | 54.577        | 79.829         | 69.862        | 56.257        | 93.085         | 80.034        | 62.411        |
| XCC2            | 76.320         | 65.448        | 53.512        | 79.637         | 68.061        | 55.202        | 100.538        | 78.824        | 61.478        |
| TD-CCSD         | 75.782         | 65.850        | 53.708        | 78.875         | 68.357        | 55.357        | 91.812         | 78.204        | 61.395        |
| TD-CC2          | 79.880         | 69.043        | 55.330        | 83.474         | 71.896        | 57.098        | 108.229        | 83.925        | 63.697        |
| propionamide    |                |               |               |                |               |               |                |               |               |
| XCCSD           | 61.539         | 54.077        | 41.273        | 64.811         | 56.436        | 42.740        | 81.759         | 67.820        | 49.478        |
| XCC2            | 60.369         | 52.765        | 40.385        | 63.769         | 55.242        | 41.865        | 110.157        | 82.153        | 49.171        |
| TD-CCSD         | 60.213         | 52.993        | 40.542        | 63.332         | 55.319        | 41.974        | 79.446         | 66.430        | 48.522        |
| TD-CC2          | 64.116         | 56.298        | 41.994        | 67.935         | 59.114        | 43.580        | 137.261        | 83.156        | 51.584        |
| 2-aminopropane  |                |               |               |                |               |               |                |               |               |
| XCCSD           | 55.429         | 53.606        | 46.869        | 59.260         | 55.957        | 48.610        | -              | 65.902        | 55.710        |
| XCC2            | 54.814         | 53.194        | 46.050        | 58.970         | 55.657        | 47.817        | -              | 67.780        | 55.357        |
| TD-CCSD         | 54.451         | 52.763        | 46.079        | 58.141         | 55.057        | 47.779        | 43.194         | 65.328        | 54.690        |
| TD-CC2          | 57.821         | 55.540        | 47.925        | 62.573         | 58.205        | 49.817        | 53.294         | 71.591        | 58.084        |
| 2-methylpropane |                |               |               |                |               |               |                |               |               |
| XCCSD           | 55.283         | 55.283        | 48.832        | 57.427         | 57.427        | 50.587        | 65.738         | 65.739        | 57.302        |
| XCC2            | 54.984         | 54.984        | 48.065        | 57.187         | 57.187        | 49.837        | 65.908         | 65.908        | 56.696        |
| TD-CCSD         | 54.612         | 54.611        | 48.095        | 56.723         | 56.722        | 49.819        | 64.900         | 64.898        | 56.408        |
| TD-CC2          | 56.871         | 56.870        | 49.714        | 59.182         | 59.180        | 51.566        | 68.358         | 68.356        | 58.757        |
| 2-nitropropane  |                |               |               |                |               |               |                |               |               |
| XCCSD           | 62.774         | 58.172        | 51.137        | 65.959         | 61.243        | 52.790        | 87.005         | 86.036        | 58.780        |
| XCC2            | 60.642         | 54.688        | 50.717        | 63.620         | 57.362        | 52.415        | 80.428         | 74.951        | 58.629        |
| TD-CCSD         | 62.206         | 55.892        | 50.515        | 65.548         | 58.550        | 52.145        | 89.728         | 77.747        | 58.048        |
| TD-CC2          | 64.857         | 58.457        | 52.463        | 68.362         | 61.311        | 54.246        | 90.379         | 79.092        | 60.784        |

TABLE I: ... continued.

|                           |        |        |        |        |        |        |         |         |        |
|---------------------------|--------|--------|--------|--------|--------|--------|---------|---------|--------|
| propanoic acid            |        |        |        |        |        |        |         |         |        |
| XCCSD                     | 55.450 | 49.557 | 37.737 | 57.795 | 51.580 | 38.864 | 65.114  | 56.669  | 43.190 |
| XCC2                      | 54.843 | 47.890 | 36.987 | 57.347 | 49.914 | 38.122 | 70.191  | 58.642  | 42.438 |
| TD-CCSD                   | 54.292 | 48.573 | 37.096 | 56.570 | 50.528 | 38.200 | 66.378  | 58.711  | 42.359 |
| TD-CC2                    | 58.067 | 51.113 | 38.420 | 60.877 | 53.340 | 39.622 | 75.604  | 63.303  | 44.213 |
| <i>N</i> -methylacetamide |        |        |        |        |        |        |         |         |        |
| XCCSD                     | 62.180 | 54.895 | 39.989 | 65.698 | 57.504 | 41.248 | 84.717  | 72.014  | 46.292 |
| XCC2                      | 60.298 | 54.130 | 39.182 | 63.877 | 56.924 | 40.463 | 97.286  | 113.932 | 46.041 |
| TD-CCSD                   | 61.232 | 53.362 | 39.312 | 64.695 | 55.816 | 40.544 | 83.331  | 69.350  | 45.471 |
| TD-CC2                    | 65.253 | 56.770 | 40.683 | 69.372 | 59.879 | 42.044 | 106.786 | 136.380 | 48.002 |
| <i>N</i> -methylformamide |        |        |        |        |        |        |         |         |        |
| XCCSD                     | 49.143 | 40.441 | 30.407 | 52.393 | 42.085 | 31.479 | 70.857  | 49.749  | 36.810 |
| XCC2                      | 47.097 | 39.768 | 29.827 | 50.326 | 41.584 | 30.919 | 73.238  | 56.337  | 37.029 |
| TD-CCSD                   | 47.624 | 39.791 | 29.889 | 50.722 | 41.398 | 30.935 | 68.319  | 48.800  | 36.119 |
| TD-CC2                    | 51.094 | 42.429 | 30.976 | 54.870 | 44.497 | 32.142 | 85.742  | 61.860  | 38.930 |
| acetaldehyde              |        |        |        |        |        |        |         |         |        |
| XCCSD                     | 36.958 | 30.716 | 24.230 | 38.776 | 32.093 | 24.975 | 46.972  | 38.534  | 27.748 |
| XCC2                      | 35.811 | 30.231 | 23.958 | 37.690 | 31.740 | 24.721 | 48.175  | 40.599  | 27.696 |
| TD-CCSD                   | 36.208 | 30.142 | 23.903 | 37.973 | 31.475 | 24.635 | 45.897  | 37.670  | 27.353 |
| TD-CC2                    | 38.467 | 32.031 | 24.671 | 40.601 | 33.720 | 25.475 | 53.264  | 43.864  | 28.664 |
| acetone                   |        |        |        |        |        |        |         |         |        |
| XCCSD                     | 47.572 | 46.281 | 34.649 | 49.732 | 48.410 | 35.708 | 58.778  | 59.871  | 39.593 |
| XCC2                      | 46.016 | 46.012 | 34.121 | 48.347 | 48.187 | 35.193 | 74.639  | 57.773  | 39.225 |
| TD-CCSD                   | 46.560 | 45.621 | 34.149 | 48.656 | 47.695 | 35.188 | 57.414  | 58.754  | 38.998 |
| TD-CC2                    | 48.974 | 48.456 | 35.216 | 51.376 | 51.067 | 36.343 | 62.158  | 82.997  | 40.629 |

TABLE I: ... continued.

| pentanol        |        |        |        |        |        |        |         |         |        |
|-----------------|--------|--------|--------|--------|--------|--------|---------|---------|--------|
| XCCSD           | 83.432 | 66.469 | 61.807 | 86.580 | 68.908 | 63.992 | 98.364  | 78.424  | 72.666 |
| XCC2            | 83.085 | 65.576 | 60.500 | 86.343 | 68.079 | 62.707 | 98.799  | 78.081  | 71.766 |
| TD-CCSD         | 82.590 | 65.291 | 60.731 | 85.693 | 67.678 | 62.867 | 97.295  | 76.991  | 71.327 |
| TD-CC2          | 86.703 | 68.105 | 62.992 | 90.154 | 70.744 | 65.339 | 103.401 | 81.327  | 75.149 |
| trifluoroethane |        |        |        |        |        |        |         |         |        |
| XCCSD           | 32.104 | 31.477 | 31.477 | 32.958 | 32.245 | 32.245 | 35.989  | 34.916  | 34.916 |
| XCC2            | 31.592 | 30.716 | 30.716 | 32.465 | 31.495 | 31.495 | 35.601  | 34.226  | 34.226 |
| TD-CCSD         | 31.586 | 30.847 | 30.847 | 32.423 | 31.597 | 31.597 | 35.391  | 34.209  | 34.209 |
| TD-CC2          | 33.285 | 32.466 | 32.466 | 34.226 | 33.301 | 33.301 | 37.617  | 36.232  | 36.232 |
| fluorobenzene   |        |        |        |        |        |        |         |         |        |
| XCCSD           | 85.447 | 83.486 | 45.266 | 91.608 | 89.929 | 47.232 | 127.625 | -       | 56.709 |
| XCC2            | 85.874 | 84.387 | 45.521 | 92.692 | 91.525 | 47.620 | 135.899 | -       | 58.178 |
| TD-CCSD         | 83.131 | 81.420 | 44.628 | 89.048 | 87.630 | 46.570 | 123.526 | 116.217 | 55.924 |
| TD-CC2          | 87.916 | 85.388 | 45.671 | 94.788 | 92.453 | 47.738 | 138.096 | 123.261 | 58.072 |
| chloroethane    |        |        |        |        |        |        |         |         |        |
| XCCSD           | 49.953 | 39.743 | 37.080 | 52.101 | 41.232 | 38.418 | 60.497  | 47.088  | 43.681 |
| XCC2            | 49.247 | 39.034 | 36.213 | 51.404 | 40.521 | 37.532 | 59.918  | 46.413  | 42.747 |
| TD-CCSD         | 49.345 | 39.210 | 36.612 | 51.462 | 40.674 | 37.932 | 59.731  | 46.431  | 43.131 |
| TD-CC2          | 51.095 | 40.330 | 37.450 | 53.353 | 41.882 | 38.830 | 62.282  | 48.051  | 44.307 |
| chloroformamide |        |        |        |        |        |        |         |         |        |
| XCCSD           | 52.312 | 47.144 | 30.490 | 55.290 | 49.814 | 31.572 | 70.198  | 63.118  | 36.151 |
| XCC2            | 51.317 | 44.664 | 29.623 | 54.588 | 47.346 | 30.694 | 75.291  | 61.608  | 35.363 |
| TD-CCSD         | 51.635 | 45.159 | 29.987 | 54.506 | 47.721 | 31.044 | 68.595  | 60.684  | 35.514 |
| TD-CC2          | 56.007 | 47.709 | 30.771 | 59.837 | 50.666 | 31.911 | 85.334  | 66.189  | 36.944 |

TABLE I: ... continued.

| benzene      |         |         |        |         |         |        |         |         |        |
|--------------|---------|---------|--------|---------|---------|--------|---------|---------|--------|
| XCCSD        | 83.668  | 83.668  | 45.723 | 90.058  | 90.058  | 47.914 | 127.742 | 127.740 | 58.725 |
| XCC2         | 84.715  | 84.715  | 46.190 | 91.765  | 91.765  | 48.534 | 136.380 | 136.379 | 60.552 |
| TD-CCSD      | 81.664  | 81.659  | 45.103 | 87.834  | 87.829  | 47.263 | 124.121 | 124.106 | 57.914 |
| TD-CC2       | 85.538  | 85.534  | 46.042 | 92.504  | 92.499  | 48.339 | 136.238 | 136.220 | 60.058 |
| cyanomethane |         |         |        |         |         |        |         |         |        |
| XCCSD        | 39.569  | 24.302  | 24.302 | 41.276  | 25.094  | 25.094 | 47.741  | 28.014  | 28.014 |
| XCC2         | 37.863  | 24.171  | 24.171 | 39.532  | 24.969  | 24.969 | 45.902  | 27.914  | 27.914 |
| TD-CCSD      | 38.992  | 24.098  | 24.098 | 40.673  | 24.883  | 24.883 | 47.037  | 27.775  | 27.775 |
| TD-CC2       | 39.885  | 24.551  | 24.551 | 41.656  | 25.363  | 25.363 | 48.424  | 28.361  | 28.361 |
| nitrobenzene |         |         |        |         |         |        |         |         |        |
| XCCSD        | 116.459 | 103.960 | 51.752 | 128.004 | 111.862 | 53.613 | 355.281 | -       | 61.145 |
| XCC2         | 118.354 | 99.857  | 51.615 | 131.377 | 107.764 | 53.573 | -       | -       | 61.740 |
| TD-CCSD      | 113.784 | 100.436 | 50.982 | 124.997 | 107.960 | 52.816 | 345.691 | 152.266 | 60.236 |
| TD-CC2       | 121.174 | 104.765 | 52.120 | 134.158 | 113.016 | 54.086 | 718.332 | 159.628 | 62.185 |
| phenol       |         |         |        |         |         |        |         |         |        |
| XCCSD        | 96.128  | 87.411  | 48.266 | 104.025 | 94.437  | 50.411 | -       | -       | -      |
| XCC2         | 96.642  | 88.040  | 48.398 | 105.409 | 95.824  | 50.685 | 173.525 | -       | 63.312 |
| TD-CCSD      | 93.412  | 85.170  | 47.510 | 100.979 | 91.926  | 49.621 | 151.898 | 116.817 | 60.798 |
| TD-CC2       | 99.520  | 89.351  | 48.791 | 108.520 | 97.079  | 51.072 | 178.939 | 124.125 | 62.858 |
| toluene      |         |         |        |         |         |        |         |         |        |
| XCCSD        | 104.739 | 92.881  | 55.236 | 112.915 | 99.517  | 57.602 | 162.714 | 138.543 | 69.033 |
| XCC2         | 106.257 | 93.531  | 55.304 | 115.274 | 100.846 | 57.810 | 174.783 | 147.462 | 70.555 |
| TD-CCSD      | 102.470 | 90.599  | 54.414 | 110.383 | 96.994  | 56.743 | 158.436 | 134.496 | 67.996 |
| TD-CC2       | 107.821 | 94.834  | 55.664 | 116.817 | 102.091 | 58.153 | 175.769 | 147.775 | 70.748 |

TABLE I: ... continued.

| cyanoethane               |         |         |        |         |         |        |         |         |        |
|---------------------------|---------|---------|--------|---------|---------|--------|---------|---------|--------|
| XCCSD                     | 52.507  | 37.496  | 34.704 | 54.761  | 38.775  | 35.833 | 63.384  | 43.523  | 40.010 |
| XCC2                      | 50.828  | 37.250  | 34.355 | 53.053  | 38.546  | 35.490 | 61.636  | 43.386  | 39.705 |
| TD-CCSD                   | 51.839  | 37.069  | 34.333 | 54.060  | 38.332  | 35.449 | 62.556  | 43.018  | 39.578 |
| TD-CC2                    | 53.277  | 38.085  | 35.098 | 55.630  | 39.418  | 36.261 | 64.715  | 44.394  | 40.582 |
| cyclopentane              |         |         |        |         |         |        |         |         |        |
| XCCSD                     | 62.774  | 62.275  | 54.994 | 65.123  | 64.594  | 56.922 | 74.060  | 73.406  | 64.256 |
| XCC2                      | 62.060  | 62.605  | 54.040 | 64.460  | 65.038  | 55.990 | 73.756  | 74.473  | 63.500 |
| TD-CCSD                   | 61.908  | 61.403  | 54.134 | 64.216  | 63.681  | 56.028 | 72.992  | 72.332  | 63.226 |
| TD-CC2                    | 64.772  | 64.221  | 55.986 | 67.324  | 66.739  | 58.026 | 77.251  | 76.522  | 65.898 |
| cyanopropane              |         |         |        |         |         |        |         |         |        |
| XCCSD                     | 69.456  | 47.876  | 44.905 | 72.458  | 49.506  | 46.372 | 83.890  | 55.582  | 51.824 |
| XCC2                      | 67.875  | 47.424  | 44.316 | 70.878  | 49.074  | 45.791 | 82.422  | 55.269  | 51.299 |
| TD-CCSD                   | 68.649  | 47.263  | 44.349 | 71.611  | 48.868  | 45.797 | 82.890  | 54.852  | 51.176 |
| TD-CC2                    | 71.000  | 48.645  | 45.434 | 74.172  | 50.348  | 46.953 | 86.386  | 56.749  | 52.632 |
| <i>o</i> -dichlorobenzene |         |         |        |         |         |        |         |         |        |
| XCCSD                     | 128.351 | 111.224 | 61.224 | 138.962 | 119.336 | 63.561 | -       | 174.839 | 74.929 |
| XCC2                      | 129.496 | 111.527 | 60.250 | 141.299 | 120.499 | 62.658 | -       | 192.157 | 75.159 |
| TD-CCSD                   | 125.195 | 108.577 | 60.313 | 135.428 | 116.396 | 62.619 | 202.878 | 169.715 | 73.861 |
| TD-CC2                    | 132.585 | 113.942 | 61.392 | 144.557 | 123.001 | 63.848 | 233.178 | 195.483 | 76.666 |
